# Supplementary material for: A new twist on cholesteric films by using reactive mesogen particles
Source: Royal Society of Chemistry journal article supplement (doi:10.1039/c5tc02920a), 2015-01-01
Supplement: c5tc02920a1.pdf [file c5tc02920a1.pdf]

## **A New Twist on Cholesteric Films by using Reactive Mesogen Particles**

E. Beltran-Gracia,<sup>a\*</sup> O. L. Parri<sup>a\*</sup>

<sup>a</sup>Merck Chemicals Ltd. Chilworth Technical Centre, University Parkway, Southampton, SO16 7QD, UK.

### **Contents:**

- **Phase Transition Behavior (POM and DSC analysis)**
- **Experimental Section and Synthesis Schematic**
- **Size Data Analysis**
- **Raman Analysis**
- **Thermal Stability**
- **Cross-Section TEM Analysis**
- **RGB Dispersion**
- **Reflected and Transmitted Light Example**
- **Reflection Spectra of Film A and Film B**
- **Viewing-Angle Dependence of Conventional Cholesteric Film**

## PHASE TRANSITION BEHAVIOR

Polarized optical microscopy (POM) studies were carried out by using an Olympus BH-2 microscope equipped with two polarizers that were operated crossed with the sample in between. A Metler Toledo FP82HT hot-stage with a Metler Toledo FP90 controller and an Infinity2 camera.

Differential scanning calorimetry (DSC) was carried out by using a DSC-Q1000 from TA instruments was used with 10 °C / min temperature ramp ranging from -20 °C till 180 °C and equilibrating at -20°C after each cycle.

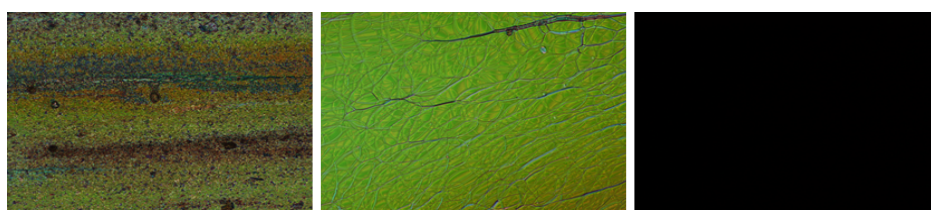

**Figure S1.** Representative POM pictures of the monomeric mixture in transmission mode. From left to right: cholesteric (r.t.), cholesteric (90°C) and isotropic liquid (134°C) for the red monomer mixture.

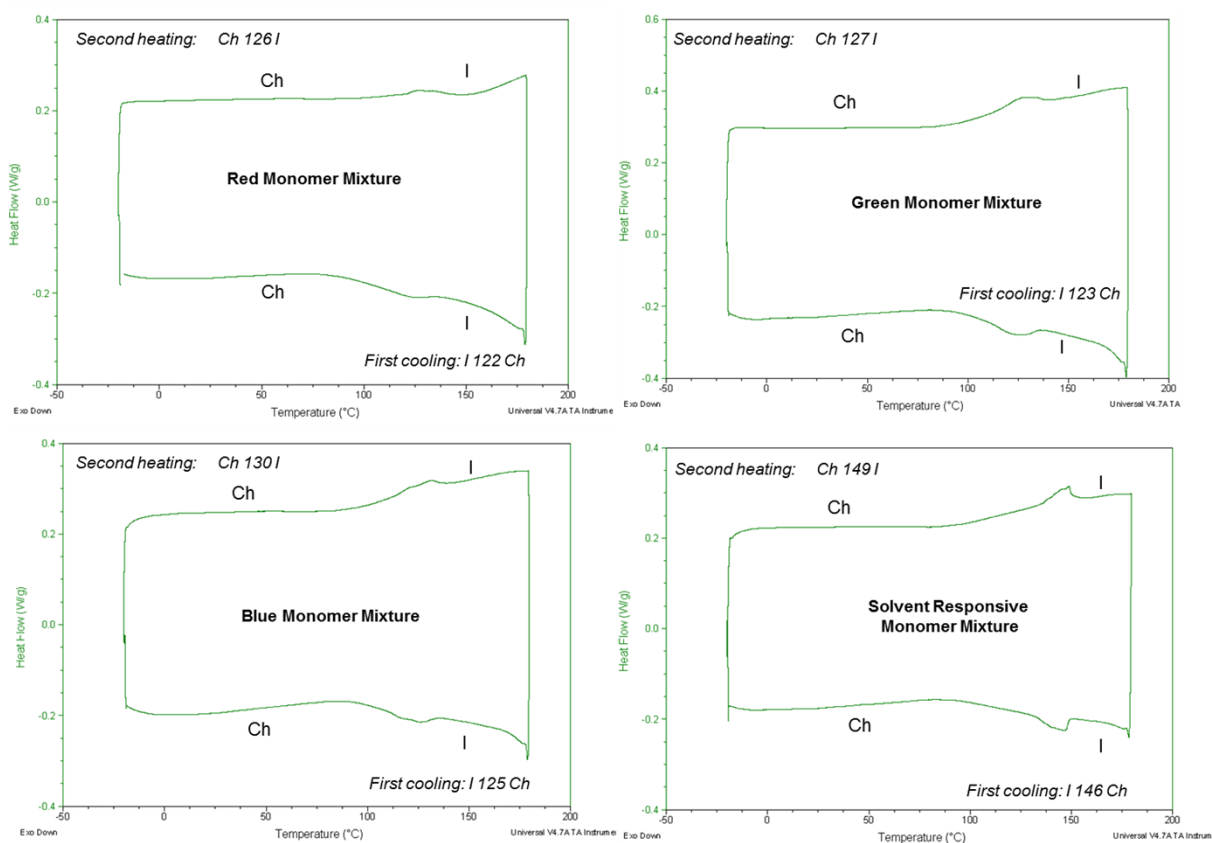

**Figure S2.** DSC thermograms of red, green, blue and solvent responsive monomer mixtures.

## EXPERIMENTAL SECTION AND SYNTHESIS SCHEMATIC

### Experimental Section

#### Materials:

RM257, RM520 and RM894 were received from Merck KGaA, Kraton G1701 EU was received from Kraton, Irgacure<sup>®</sup>369 and Irganox<sup>®</sup>1076 were purchased from BSAF and dodecane were purchased from Sigma-Aldrich. PMMA resin (Acryfix<sup>®</sup> 9019 Solar) was received from Evonik Industries. Epoxy resin (SU-2008) was purchased from Microchem. Materials were used without any further purification.

#### Cholesteric Reactive Mesogen Particles Synthesis:

In the first step, the Kraton G1701EU (350 mg) is dissolved in dodecane (45 mL) at 100°C and poured onto the melted cholesteric mixture based on RM257 (3.0 g), RM520 (2.0 g), Irgacure<sup>®</sup>369 (150 mg) and Irganox<sup>®</sup>1076 (4.8 mg) and RM894 (85mg for Infrared particles, 155mg for Red particles, 165mg for Green particles and 210mg for Blue particles) at 90°C. The emulsion is formed and homogenised by using a IKA homogeniser (T25 digital Ultra-Turrax<sup>®</sup>) for 20 min at 14600 rpm. The previously formed emulsion is added to a flask previously heated to 90°C and the polymerization is initiated under UV light irradiation (10mW/cm<sup>2</sup>) for 15 minutes. Finally, polymer particles formed are filtered by using a 50 micron filter cloth and are centrifuged at 10000rpm for 10 minutes. After the first centrifuge cycle, particles are washed with dodecane twice and toluene until the solution is clear.

#### Solvent ResponsiveCholesteric Reactive Mesogen Particles Synthesis:

In the first step, the Kraton G1701EU (350 mg) is dissolved in dodecane (45 mL) at 100°C and poured onto the melted cholesteric mixture based on RM257 (2.2 g), RM520 (2.8 g), Irgacure<sup>®</sup>369 (150 mg) and Irganox<sup>®</sup>1076 (4.8 mg) and RM894 (165mg) at 90°C. The emulsion is formed and homogenised by using a IKA homogeniser (T25 digital Ultra-Turrax<sup>®</sup>) for 20 min at 14600 rpm. The previously formed emulsion is added to a flask previously heated to 90°C and the polymerization is initiated

under UV light irradiation ( $10\text{mW}/\text{cm}^2$ ) for 15 minutes. Finally, polymer particles formed are filtered by using a 50 micron filter cloth and are centrifuged at 10000rpm for 10 minutes. After the first centrifuge cycle, particles are washed with dodecane twice and toluene until the solution is clear.

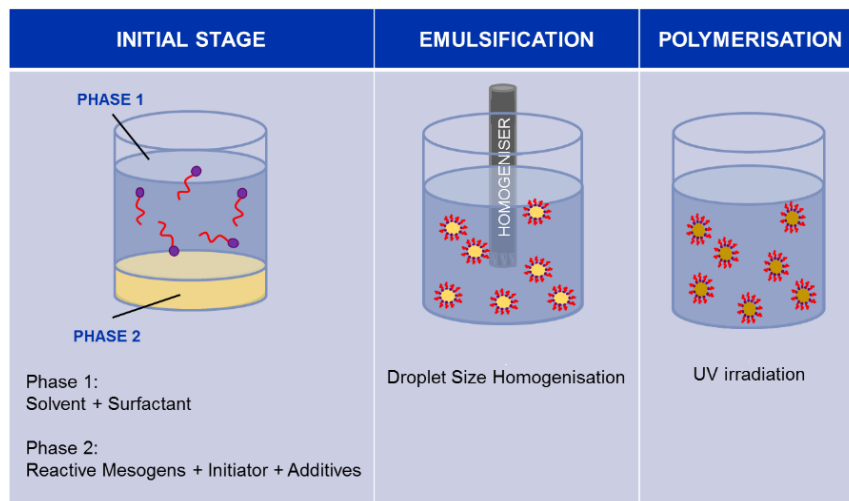

**Figure S3.** Scheme representing the synthesis of the particles.

## SIZE DATA ANALYSIS

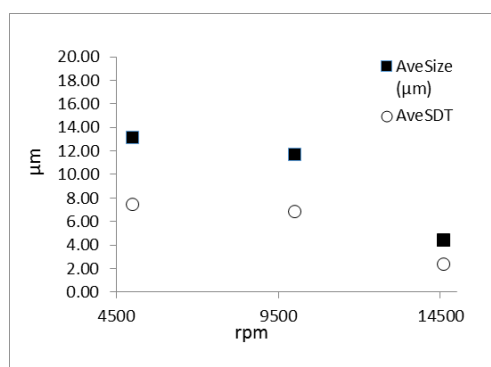

| Batch     | rpm   | Average Size (μm) | SDT  | Reproducibility |             |                    |
|-----------|-------|-------------------|------|-----------------|-------------|--------------------|
|           |       |                   |      | AveSize (μm)    | Average SDT | >50μm <sup>a</sup> |
| Sample 1a | 14600 | 4.71              | 2.66 | 4.41            | 2.40        | 0                  |
| Sample 1b | 14600 | 4.19              | 2.10 |                 |             |                    |
| Sample 1c | 14600 | 4.33              | 2.45 |                 |             |                    |
| Sample 2a | 10000 | 9.87              | 6.64 | 11.74           | 6.86        | 1.5                |
| Sample 2b | 10000 | 12.20             | 6.69 |                 |             |                    |
| Sample 2c | 10000 | 13.14             | 7.26 |                 |             |                    |
| Sample 3a | 5000  | 13.23             | 7.43 | 13.12           | 7.44        | 3                  |
| Sample 3b | 5000  | 12.90             | 6.90 |                 |             |                    |
| Sample 3c | 5000  | 13.24             | 7.99 |                 |             |                    |

<sup>a</sup> Range of material found when filtering the dispersion of particles through a 50 micron cloth (0: no solid residue, 3: solid residue on the cloth)

a)

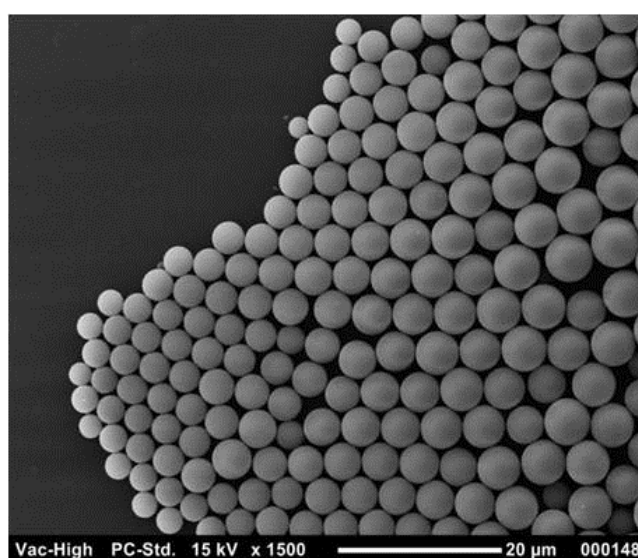

b)

**Figure S4.** a) Size vs Stirring power representation of the optimized formulation. The table represents data of each sample used in the analysis. b) SEM image of ChRMPs corresponding to the sample 1a.

## RAMAN ANALYSIS

Residual surfactant content was analysed by using a Renishaw inVia Raman microscope. Samples are prepared by deposition of specimens on glass substrates.

Samples analysed were:

- 1) Kraton which is a clear, linear triblock copolymer based on styrene and ethylene/butylene with a polystyrene content of 30%. Styrene peaks at  $1001.4\text{cm}^{-1}$  and  $1031.8\text{cm}^{-1}$  are taken as a reference
- 2) Flakes created after evaporating all fractions obtained when washing particles
- 3) Particles after the washing step.

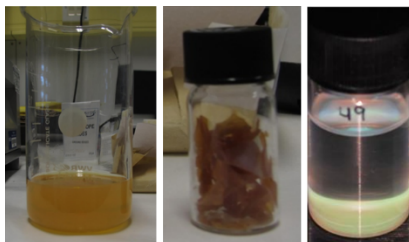

**Figure S5.** From left to right: fraction obtained after washing the particles, flakes produced and particles in clean solvent.

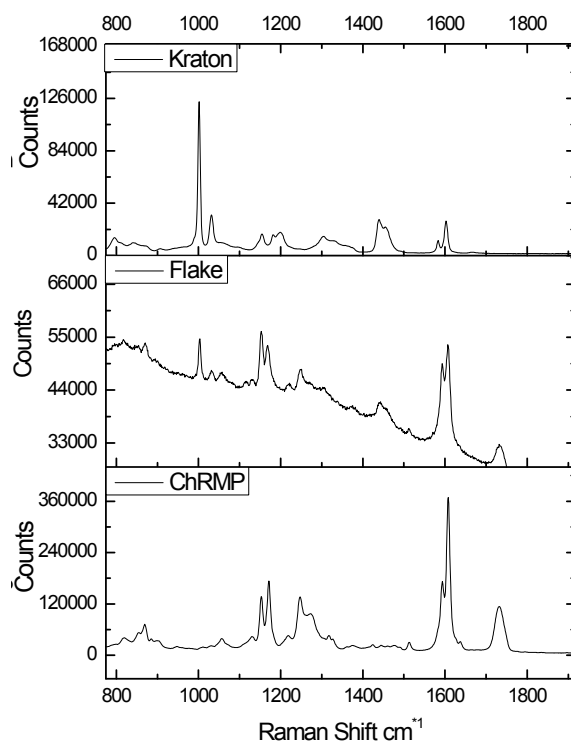

**Figure S6.** From top to bottom: Raman spectrum for Kraton, flakes and particles. Measurements are carried out in single specimens.

#### THERMAL STABILITY

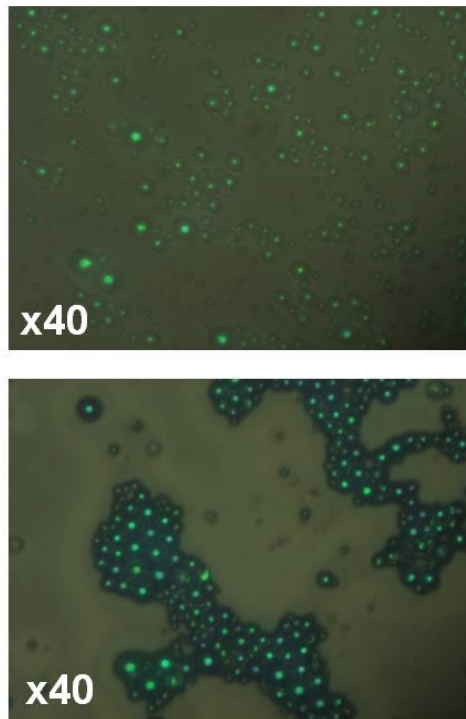

**Figure S7.** Dispersion of particles in dodecane at room temperature (upper image) and at 220°C after evaporating all the solvent (lower image).

### CROSS-SECTION TEM ANALYSIS

Dispersion of Ch RMPs in poly(methylmethacrylate) (PMMA) was coated on triacetyl cellulose (TAC). Early prepared film is embedded in a resin and by using a microtome the cross-section of the particles is ready to be studied

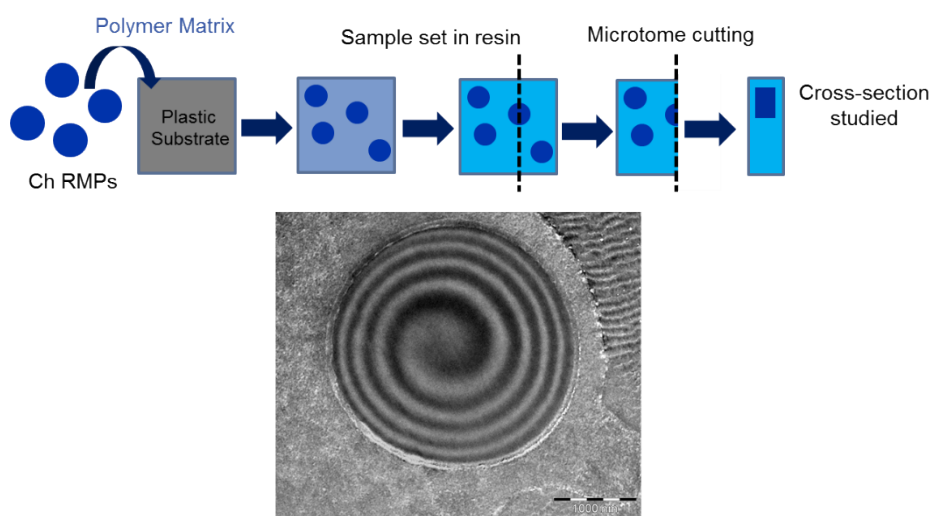

**Figure S8.** TEM image from the cross-section of particles

### RGB DISPERSION

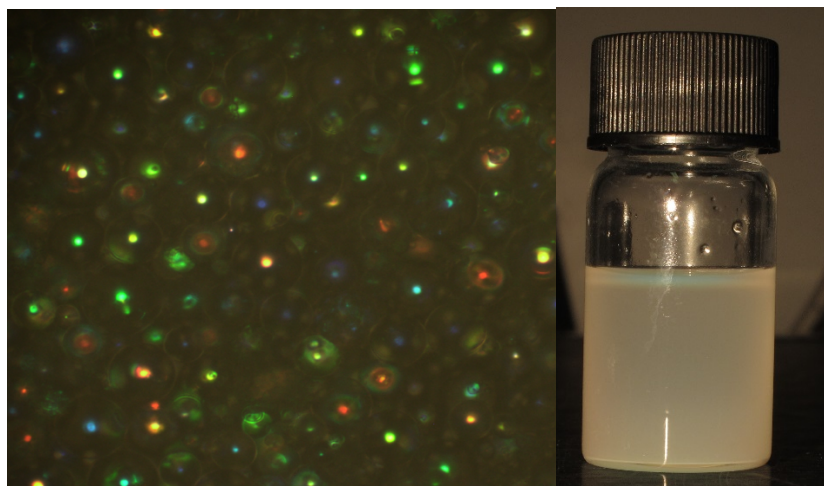



**Figure S9.** Polarised Optical Microscopy image of RGB dispersion based on Ch RMPs (left). Picture of the RGB dispersion (right).

#### REFLECTED AND TRANSMITTED LIGHT ON FILM

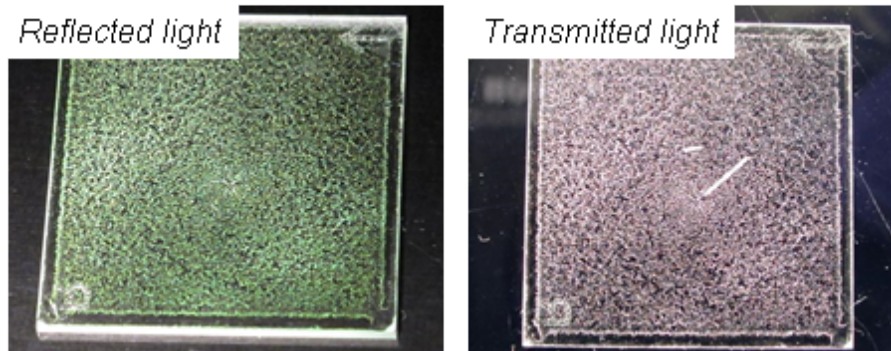

**Figure S10.** Reflection and Transmission of a film containing green ChRMPs.

#### REFLECTION SPECTRA OF FILM A AND FILM B

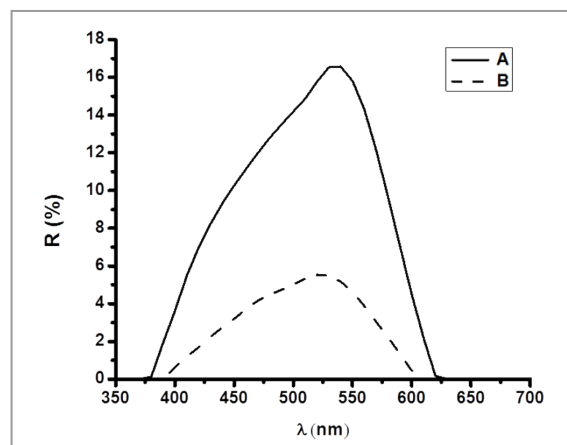

**Figure S11.** Reflection spectra of Film A (solid line) and Film B (dashed line).

#### VIEWING-ANGLE DEPENDENCE OF CONVENTIONAL CHOLESTERIC FILM

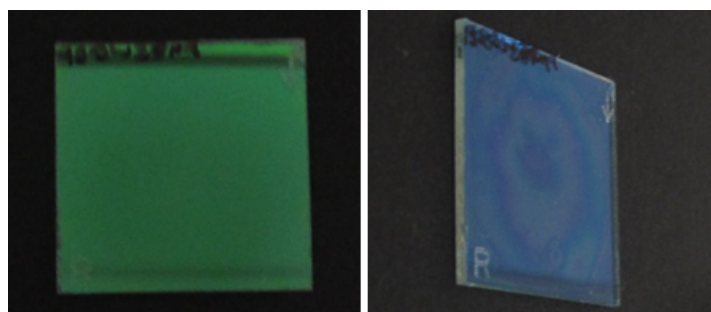

**Figure S12.** Viewing-angle dependence of a conventional Green cholesteric film on rubbed PI glass.
